# Supplementary material for: A critical assessment of using ChatGPT for extracting structured data from clinical notes
Source: PubMed Central journal article supplement (PMC11063058; doi:10.1038/s41746-024-01079-8), 2024-05-01
Supplement: 41746_2024_1079_MOESM1_ESM.pdf [file 41746_2024_1079_MOESM1_ESM.pdf]

| <b>T (Primary Tumor)</b> |                                                                                                                                                                                                                                                                                                                                                                                                                     |
|--------------------------|---------------------------------------------------------------------------------------------------------------------------------------------------------------------------------------------------------------------------------------------------------------------------------------------------------------------------------------------------------------------------------------------------------------------|
| TX                       | Primary tumor cannot be assessed, or tumor proven by the presence of malignant cells in sputum or bronchial washings but not visualized by imaging or bronchoscopy                                                                                                                                                                                                                                                  |
| T0                       | No evidence of primary tumor                                                                                                                                                                                                                                                                                                                                                                                        |
| Tis                      | Carcinoma in situ                                                                                                                                                                                                                                                                                                                                                                                                   |
| T1                       | Tumor ≤3 cm in greatest dimension, surrounded by lung or visceral pleura, without bronchoscopic evidence of invasion more proximal than the lobar bronchus (i.e., not in the main bronchus) <sup>a</sup>                                                                                                                                                                                                            |
| T1a                      | Tumor ≤2 cm in greatest dimension                                                                                                                                                                                                                                                                                                                                                                                   |
| T1b                      | Tumor >2 cm but ≤3 cm in greatest dimension                                                                                                                                                                                                                                                                                                                                                                         |
| T2                       | Tumor >3 cm but ≤7 cm or tumor with any of the following features (T2 tumors with these features are classified T2a if ≤5 cm)<br>Involves main bronchus, ≥2 cm distal to the carina<br>Invades visceral pleura<br>Associated with atelectasis or obstructive pneumonitis that extends to the hilar region but does not involve the entire lung                                                                      |
| T2a                      | Tumor >3 cm but ≤5 cm in greatest dimension                                                                                                                                                                                                                                                                                                                                                                         |
| T2b                      | Tumor >5 cm but ≤7 cm in greatest dimension                                                                                                                                                                                                                                                                                                                                                                         |
| T3                       | Tumor >7 cm or one that directly invades any of the following: chest wall (including superior sulcus tumors), diaphragm, phrenic nerve, mediastinal pleura, parietal pericardium; or tumor in the main bronchus <2 cm distal to the carina <sup>a</sup> but without involvement of the carina; or associated atelectasis or obstructive pneumonitis of the entire lung or separate tumor nodule(s) in the same lobe |
| T4                       | Tumor of any size that invades any of the following: mediastinum, heart, great vessels, trachea, recurrent laryngeal nerve, esophagus, vertebral body, carina; separate tumor nodule(s) in a different ipsilateral lobe                                                                                                                                                                                             |

| <b>N (Regional Lymph Nodes)</b> |                                                                                                                                                  |
|---------------------------------|--------------------------------------------------------------------------------------------------------------------------------------------------|
| NX                              | Regional lymph nodes cannot be assessed                                                                                                          |
| N0                              | No regional lymph node metastasis                                                                                                                |
| N1                              | Metastasis in ipsilateral peribronchial and/or ipsilateral hilar lymph nodes and intrapulmonary nodes, including involvement by direct extension |
| N2                              | Metastasis in ipsilateral mediastinal and/or subcarinal lymph node(s)                                                                            |
| N3                              | Metastasis in contralateral mediastinal, contralateral hilar, ipsilateral or contralateral scalene, or supraclavicular lymph node(s)             |
| <b>M (Distant Metastasis)</b>   |                                                                                                                                                  |
| MX                              | Distant metastasis cannot be assessed                                                                                                            |
| M0                              | No distant metastasis                                                                                                                            |
| M1                              | Distant metastasis                                                                                                                               |
| M1a                             | Separate tumor nodule(s) in a contralateral lobe; tumor with pleural nodules or malignant pleural (or pericardial) effusion <sup>b</sup>         |
| M1b                             | Distant metastasis                                                                                                                               |

**TABLE 4.** Descriptors, Proposed T and M Categories, and Proposed Stage Groupings

| <b>Sixth Edition<br/>T/M Descriptor</b> | <b>Proposed<br/>T/M</b> | <b>N0</b>   | <b>N1</b>   | <b>N2</b>   | <b>N3</b>   |
|-----------------------------------------|-------------------------|-------------|-------------|-------------|-------------|
| T1 (≤2 cm)                              | T1a                     | IA          | IIA         | IIIA        | IIIB        |
| T1 (>2–3 cm)                            | T1b                     | IA          | IIA         | IIIA        | IIIB        |
| T2 (≤5 cm)                              | T2a                     | IB          | <b>IIA</b>  | IIIA        | IIIB        |
| T2 (>5–7 cm)                            | T2b                     | <b>IIA</b>  | IIB         | IIIA        | IIIB        |
| T2 (>7 cm)                              | T3                      | <b>IIIB</b> | <b>IIIA</b> | IIIA        | IIIB        |
| T3 invasion                             |                         | IIB         | IIIA        | IIIA        | IIIB        |
| T4 (same lobe nodules)                  |                         | <b>IIIB</b> | <b>IIIA</b> | <b>IIIA</b> | IIIB        |
| T4 (extension)                          | T4                      | <b>IIIA</b> | <b>IIIA</b> | IIIB        | IIIB        |
| M1 (ipsilateral lung)                   |                         | <b>IIIA</b> | <b>IIIA</b> | <b>IIIB</b> | <b>IIIB</b> |
| T4 (pleural effusion)                   | M1a                     | <b>IV</b>   | <b>IV</b>   | <b>IV</b>   | <b>IV</b>   |
| M1 (contralateral lung)                 |                         | IV          | IV          | IV          | IV          |
| M1 (distant)                            | M1b                     | IV          | IV          | IV          | IV          |

Cells in bold indicate a change from the sixth edition for a particular TNM category.

Supplementary Figure 1. AJCC TNM Staging Guide (7<sup>th</sup> Ed. From (P. Goldstraw, et. al. 2007)).

## Case TCGA-44-2656

### MICROSCOPIC DESCRIPTION

A.  
 Histologic type: Adenocarcinoma.  
 Histologic grade: Moderately differentiated.  
 Primary tumor: Primary tumor measures 2.0 cm, but invades the visceral pleura.  
 Margins of resection: Uninvolved.  
 Direct extension of tumor: Not identified.  
 Venous (large vessel) invasion: Identified.  
 Arterial (large vessel) invasion: Identified.  
 Lymphatic (small vessel) invasion: Not identified.  
 Regional lymph nodes (pN): None positive (pN0).  
 Distant metastasis (pM): Cannot be evaluated by this specimen

### DIAGNOSIS

- A. Lung, right upper lobe, resection:  
 - Adenocarcinoma, moderately differentiated, 2.0 cm. surgical margins uninvolved.  
 - Nine lymph nodes with no evidence of metastasis.  
 B. 2R lymph nodes, resection:  
 - No evidence of metastasis the six lymph nodes (0/6).  
 C. 4R lymph nodes, resection:  
 - Two lymph nodes with no evidence of metastasis (0/2).  
 D. Station 7 lymph nodes, resection:  
 - No evidence of metastasis in three lymph nodes (0/3).  
 - Granulomatous inflammation.  
 E. Station 9 lymph node, metastasis:  
 - One lymph node with no evidence of metastasis (0/1).

### DIAGNOSIS

[REDACTED]

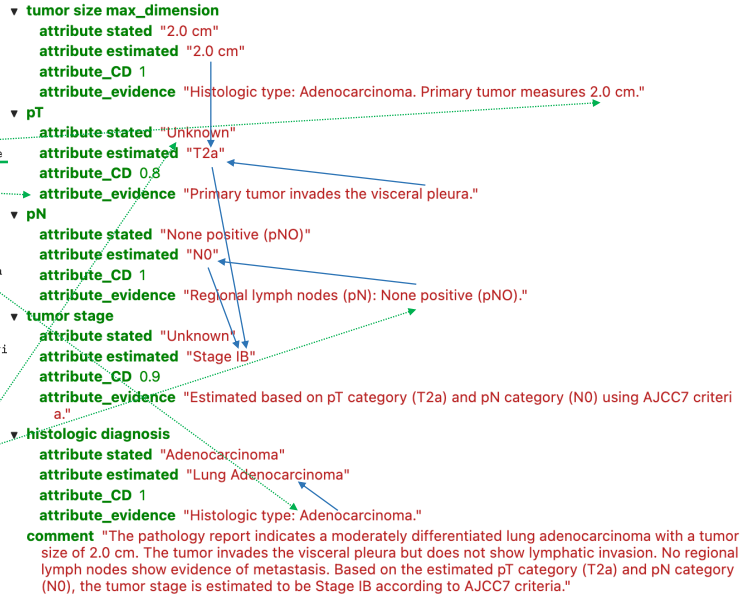

Supplementary Figure 2. Case TCGA-44-2656 shows that ChatGPT correctly extracted relevant information from the note and made sound inference about the pT category based on the AJCC guideline.

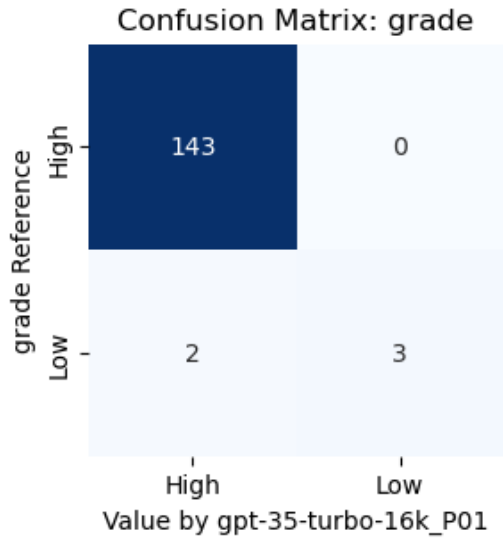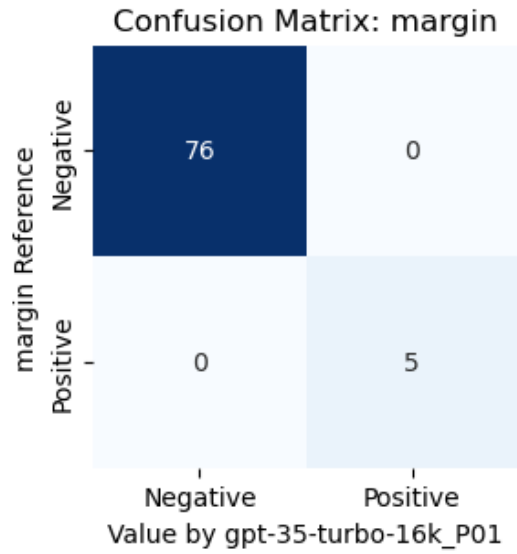

Supplementary Figure 3. The presented prompting strategy is applied structured data extraction from osteosarcoma clinic notes. The GPT model used for our experiment is GPT-3.5-Turbo-16K (version 0613) and it was deployed on dedicated AzureAI cloud service.

**GPT Output:** ▼ **Histologic Grade**

**attribute stated** "Histologic grade: Grade 3: Poorly differentiated, high grade"

**attribute value** "G3 (High)"

**Histologic Grade\_CD** 1

**Histologic Grade\_evidence** "The clinic note explicitly states the histologic grade as Grade 3: Poorly differentiated, high grade."

Case: P0034\_C02

Relevant part of clinic note:

**Histologic grade:** Grade 3: Poorly differentiated, high grade  
**Margins:** Uninvolved by sarcoma  
Distance of sarcoma from closest margin: 0.2 cm  
Specify margin: Anterior margin

▼ **Margin Status**

**attribute stated** "Margins: Uninvolved by sarcoma"

**attribute value** "Negative"

**Margin Status\_CD** 1

**Margin Status\_evidence** "The clinic note states that the surgical margins are uninvolved by sarcoma."

Supplementary Figure 4. An example to illustrate that the GPT model correctly captured histologic grade and margin category as well as the key evidence.

```
1  authenticate OpenAI API key
2  for each file in pathology report folder:
3      read in report
4      create instructive prompt for the report
5      estimate number of tokens of the prompt with tiktokens
6      if #tokens less than a threshold:
7          try:
8              construct chat message
9              create a ChatCompletion with a GPT model and the message
10             call OpenAI API and get the response
11             extract the GPT model output
12             write the GPT output to a file in GPT Output folder
13         except:
14             output message: the file is failed to get response
15             append the file to unprocessed filelist
16     else:
17         append the file to unprocessed filelist
```

Supplementary Figure 5. Algorithm of GPT-Powered Pathology Report Reader

Supplementary Table 1. Performance of ChatGPT, WordPiece tokenizer and NER Classifier in terms of pN, pT, overall tumor stage and histological diagnosis

| <b>A. primary tumor features (pT)</b> | <b>Accuracy</b> | <b>F1</b> | <b>Kappa</b> | <b>Recall</b> | <b>Precision</b> |
|---------------------------------------|-----------------|-----------|--------------|---------------|------------------|
| GPT-3.5-Turbo-16K                     | 0.87            | 0.87      | 0.76         | 0.87          | 0.89             |
| GPT-4-Turbo-1106-preview              | 0.91            | 0.91      | 0.84         | 0.91          | 0.92             |
| NER Classifier                        | 0.35            | 0.42      | 0.14         | 0.35          | 0.65             |
| WordPiece tokenizer                   | 0.74            | 0.75      | 0.55         | 0.74          | 0.78             |

| <b>B. regional lymph node involvement (pN)</b> | <b>Accuracy</b> | <b>F1</b> | <b>Kappa</b> | <b>Recall</b> | <b>Precision</b> |
|------------------------------------------------|-----------------|-----------|--------------|---------------|------------------|
| ChatGPT                                        | 0.91            | 0.92      | 0.84         | 0.92          | 0.92             |
| GPT-4-Turbo-1106-preview                       | 0.95            | 0.95      | 0.91         | 0.95          | 0.96             |
| NER Classifier                                 | 0.48            | 0.50      | 0.24         | 0.48          | 0.69             |
| WordPiece tokenizer                            | 0.70            | 0.71      | 0.46         | 0.70          | 0.74             |

| <b>C. overall tumor stage</b> | <b>Accuracy</b> | <b>F1</b> | <b>Kappa</b> | <b>Recall</b> | <b>Precision</b> |
|-------------------------------|-----------------|-----------|--------------|---------------|------------------|
| GPT-3.5-Turbo-16K             | 0.76            | 0.76      | 0.61         | 0.76          | 0.77             |
| GPT-4-Turbo-1106-preview      | 0.89            | 0.89      | 0.82         | 0.89          | 0.89             |
| NER Classifier                | 0.30            | 0.28      | 0.06         | 0.30          | 0.51             |
| WordPiece tokenizer           | 0.66            | 0.67      | 0.46         | 0.67          | 0.68             |

| <b>D. histological diagnosis</b> | <b>Accuracy</b> | <b>F1</b> | <b>Kappa</b> | <b>Recall</b> | <b>Precision</b> |
|----------------------------------|-----------------|-----------|--------------|---------------|------------------|
| GPT-3.5-Turbo-16K                | 0.99            | 0.99      | 0.98         | 0.99          | 0.99             |
| GPT-4-Turbo-1106-preview         | 0.99            | 0.99      | 0.98         | 0.99          | 0.99             |
| NER Classifier                   | 0.93            | 0.92      | 0.86         | 0.93          | 0.91             |
| WordPiece tokenizer              | 0.93            | 0.92      | 0.86         | 0.93          | 0.92             |

| <b>E. Average</b>        | <b>Accuracy</b> | <b>F1</b> | <b>Kappa</b> | <b>Recall</b> | <b>Precision</b> |
|--------------------------|-----------------|-----------|--------------|---------------|------------------|
| GPT-3.5-Turbo-16K        | 0.89            | 0.88      | 0.80         | 0.89          | 0.89             |
| GPT-4-Turbo-1106-preview | 0.94            | 0.94      | 0.89         | 0.94          | 0.94             |
| NER Classifier           | 0.51            | 0.53      | 0.32         | 0.51          | 0.69             |
| WordPiece tokenizer      | 0.76            | 0.76      | 0.58         | 0.76          | 0.78             |
